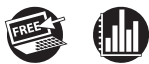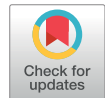

RESPONSE TO COMMENT ON CRAIG ET AL.

# Prevalence of Celiac Disease in 52,721 Youth With Type 1 Diabetes: International Comparison Across Three Continents. *Diabetes Care* 2017;40:1034–1040

*Diabetes Care* 2017;40:e168–e169 | <https://doi.org/10.2337/dci17-0040>

Maltoni et al. (1) report a high prevalence (9.8%) of celiac disease (CD) in 2,164 youth with type 1 diabetes from five pediatric diabetes centers in northern Italy. This is considerably higher than in our recent report (3.5%) from three continents (U.K./Austria/Germany, U.S., and Australia) (2) and the pooled prevalence of 5.1% in a systematic review of CD in type 1 diabetes (3). Maltoni et al. propose that their higher rate of CD may be explained by more active screening programs in Italy. We agree that this is likely to be a contributing factor, as previous reports of high rates of coexisting CD and type 1 diabetes in Italy (4) and of CD in the general population may have heightened awareness of CD risk. It is of note, however, that we used a stringent definition of biopsy-proven CD and that a further 2% of youth from the Prospective

Diabetes Follow-up Registry (DPV) and the T1D Exchange Clinic Network (T1DX) registry were suspected of having CD on the basis of positive serology but had not undergone small-bowel biopsy.

We read with interest that the diagnosis of CD preceded type 1 diabetes in 19% of case subjects in the Italian study compared with 5.4% in our report. In keeping with Maltoni et al., we did not classify those with positive CD antibodies at diabetes diagnosis as having preexisting CD. A further 46% demonstrated their first CD autoantibody positivity at type 1 diabetes diagnosis in the Italian study compared with 37% within the first year after diagnosis of type 1 diabetes in our report. The contrasting rates prior to diabetes diagnosis imply a higher awareness of CD risk in the general population in Italy, and we speculate that clinicians may be more

Maria E. Craig,<sup>1,2,3</sup> Nicole Prinz,<sup>4,5</sup> Claire T. Boyle,<sup>6</sup> Fiona M. Campbell,<sup>7</sup> Timothy W. Jones,<sup>8,9</sup> Sabine E. Hofer,<sup>10</sup> Jill H. Simmons,<sup>11</sup> Naomi Holman,<sup>12</sup> Elaine Tham,<sup>13</sup> Elke Fröhlich-Reiterer,<sup>14</sup> Stephanie DuBose,<sup>6</sup> Helen Thornton,<sup>15</sup> Bruce King,<sup>16</sup> David M. Maahs,<sup>17</sup> Reinhard W. Holl,<sup>4,5</sup> and Justin T. Warner,<sup>18</sup> on behalf of the Australasian Diabetes Data Network (ADDN), the T1D Exchange Clinic Network (T1DX), the National Paediatric Diabetes Audit (NPDA) and the Royal College of Paediatrics and Child Health, and the Prospective Diabetes Follow-up Registry (DPV) initiative\*

likely to screen for CD. The lower incidence of type 1 diabetes in Italy compared with the countries represented in our report may also underlie the different prevalence rates of CD overall. While HLA-DQ2 confers risk for both CD and type 1 diabetes, the penetrance of other risk alleles for type 1 diabetes may be lower in the Italian population. Moreover, it is plausible that the impact of environmental factors that initiate

<sup>1</sup>The Children's Hospital at Westmead, Sydney, New South Wales, Australia

<sup>2</sup>University of New South Wales, Sydney, New South Wales, Australia

<sup>3</sup>Charles Perkins Centre Westmead, University of Sydney, Sydney New South Wales, Australia

<sup>4</sup>Institute of Epidemiology and Medical Biometry, University of Ulm, Ulm, Germany

<sup>5</sup>German Center for Diabetes Research (DZD), Munich-Neuherberg, Germany

<sup>6</sup>Jaeb Center for Health Research, Tampa, FL

<sup>7</sup>Leeds Children's Hospital, Leeds, U.K.

<sup>8</sup>The University of Western Australia, Perth, Western Australia, Australia

<sup>9</sup>Telethon Kids Institute, Perth, Western Australia, Australia

<sup>10</sup>Department of Pediatrics, Medical University of Innsbruck, Innsbruck, Austria

<sup>11</sup>Vanderbilt University Medical Center, Nashville, TN

<sup>12</sup>Institute of Cardiovascular and Medical Sciences, University of Glasgow, Glasgow, U.K.

<sup>13</sup>Women's and Children's Hospital, Adelaide, South Australia, Australia

<sup>14</sup>Department of Pediatrics, Medical University of Graz, Graz, Austria

<sup>15</sup>St Helens and Knowsley Teaching Hospitals NHS Trust, St Helens, U.K.

<sup>16</sup>John Hunter Children's Hospital, Hunter Medical Research Institute, University of Newcastle, Callaghan, New South Wales, Australia

<sup>17</sup>Lucile Salter Packard Children's Hospital Stanford, Stanford University Medical Center, Palo Alto, CA

<sup>18</sup>Children's Hospital for Wales, Cardiff, U.K.

Corresponding author: Maria E. Craig, [m.craig@unsw.edu.au](mailto:m.craig@unsw.edu.au).

This article contains Supplementary Data online at <http://care.diabetesjournals.org/lookup/suppl/doi:10.2337/dci17-0040/-/DC1>.

\*A listing of information for the ADDN, the T1DX, the NPDA, and the DPV initiative can be found in the Supplementary Data online.

© 2017 by the American Diabetes Association. Readers may use this article as long as the work is properly cited, the use is educational and not for profit, and the work is not altered. More information is available at <http://www.diabetesjournals.org/content/license>.

and accelerate type 1 diabetes, such as viral infections (5), may vary between these populations. Another putative explanation is differences in exposure to gluten and/or methods of wheat production that may modify the antigenicity of gluten. Finally, neither report provides data on screening frequency after diabetes diagnosis, which likely influences case detection.

The contrasting findings across these populations, along with the observation that CD is diagnosed after more than 2 years of type 1 diabetes duration (in our report, 40%), highlight the importance of regular screening for CD in people with type 1 diabetes.

**Acknowledgments.** The authors thank the thousands of patients and families who contributed to these registries/audits and the numerous investigators.

**Funding.** The DPV is supported through the German Federal Ministry for Education and Research within the Competence Network for Dia-

betes Mellitus (grant FKZ 01G1106), which was integrated into the German Center for Diabetes Research (DZD) as of January 2015. The T1DX is supported through The Leona M. and Harry B. Helmsley Charitable Trust. The National Paediatric Diabetes Audit (NPDA) is funded by the Healthcare Quality Improvement Partnership and delivered by the Royal College of Paediatrics and Child Health. The Australasian Diabetes Data Network (ADDN) is supported by The Australian Type 1 Diabetes Clinical Research Network, led by JDRF Australia (grant 17-2011-665), the recipient of Australian Government funding from the Australian Research Council (through a Special Research Initiative) and the Department of Health and Ageing. M.E.C. is a recipient of a National Health and Medical Research Council Practitioner fellowship (APP1045777).

**Duality of Interest.** R.W.H. holds an equity fund that may contain stock from pharmaceutical companies. No other potential conflicts of interest relevant to this article were reported.

## References

1. Maltoni G, Franceschi R, D'Annunzio G, Toni S, Rabbone I, Zucchini S. Comment on Craig et al. Prevalence of celiac disease in 52,721 youth with type 1 diabetes: international comparison across three continents. *Diabetes Care* 2017;40:1034–1040 (Letter). *Diabetes Care* 2017;40:e167. <https://doi.org/10.2337/dc17-1348>
2. Craig ME, Prinz N, Boyle CT, et al.; Australasian Diabetes Data Network (ADDN); T1D Exchange Clinic Network (T1DX); National Paediatric Diabetes Audit (NPDA) and the Royal College of Paediatrics and Child Health; Prospective Diabetes Follow-up Registry (DPV) initiative. Prevalence of celiac disease in 52,721 youth with type 1 diabetes: international comparison across three continents. *Diabetes Care* 2017;40:1034–1040
3. Pham-Short A, Donaghue KC, Ambler G, Phelan H, Twigg S, Craig ME. Screening for celiac disease in type 1 diabetes: a systematic review. *Pediatrics* 2015;136:e170–e176
4. Cerutti F, Bruno G, Chiarelli F, Lorini R, Meschi F, Sacchetti C; Diabetes Study Group of the Italian Society of Pediatric Endocrinology and Diabetology. Younger age at onset and sex predict celiac disease in children and adolescents with type 1 diabetes: an Italian multicenter study. *Diabetes Care* 2004;27:1294–1298
5. Yeung G, Rawlinson WD, Craig ME. Enterovirus infection and type 1 diabetes mellitus – a systematic review of molecular studies. *BMJ* 2011;342:d35
